# Waiting times, patient flow, and occupancy density in South African primary health care clinics: implications for infection prevention and control

Aaron S Karat<sup>1,2</sup>, Nicky McCreesh<sup>1</sup>, Kathy Baisley<sup>1,3</sup>, Indira Govender<sup>1</sup>, Idriss I Kallon<sup>4,5</sup>, Karina Kielmann<sup>2</sup>, Hayley MacGregor<sup>6</sup>, Anna Vassall<sup>1</sup>, Tom A Yates<sup>7</sup>, Alison D Grant<sup>1,3,8</sup>

## Affiliations

1. TB Centre, London School of Hygiene & Tropical Medicine, London, United Kingdom
2. The Institute for Global Health and Development, Queen Margaret University, Edinburgh, United Kingdom
3. Africa Health Research Institute, School of Laboratory Medicine & Medical Sciences, College of Health Sciences, University of KwaZulu-Natal, Durban, South Africa
4. Division of Social and Behavioural Sciences, Faculty of Health Sciences, University of Cape Town, Cape Town, South Africa
5. Centre for Evidence-based Health Care, Division of Epidemiology and Biostatistics, Department of Global Health, Faculty of Medicine and Health Sciences, Stellenbosch University, Cape Town, South Africa
6. The Institute of Development Studies, University of Sussex, Brighton, United Kingdom
7. Department of Infectious Disease, Faculty of Medicine, Imperial College London, London, United Kingdom
8. School of Public Health, Faculty of Health Sciences, University of the Witwatersrand, Johannesburg, South Africa

## Corresponding author

Dr Aaron Karat, Department of Clinical Research, Faculty of Infectious and Tropical Diseases, London School of Hygiene & Tropical Medicine, Keppel Street, London WC1E 7HT, United Kingdom

Tel: +44 (0)20 7636 8636 | Email: [aaron.s.karat@gmail.com](mailto:aaron.s.karat@gmail.com)

NOTE: This preprint reports new research that has not been certified by peer review and should not be used to guide clinical practice.

## 1 **Abstract**

---

### 2 **Background**

3 Transmission of respiratory pathogens, such as *Mycobacterium tuberculosis* and severe acute respiratory  
4 syndrome coronavirus 2, is more likely during close, prolonged contact and when sharing a poorly ventilated  
5 space. In clinics in KwaZulu-Natal (KZN) and Western Cape (WC), South Africa, we estimated clinic visit  
6 duration, time spent indoors and outdoors, and occupancy density of waiting rooms.

### 7 **Methods**

8 We used unique barcodes to track attendees' movements in 11 clinics in two provinces, multiple imputation  
9 to estimate missing arrival and departure times, and mixed-effects linear regression to examine associations  
10 with visit duration.

### 11 **Results**

12 2,903 attendees were included. Median visit duration was 2 hours 36 minutes (interquartile range [IQR]  
13 01:36–3:43). Longer mean visit times were associated with being female (13.5 minutes longer than males;  
14  $p < 0.001$ ) and attending with a baby (18.8 minutes longer than those without;  $p < 0.01$ ), and shorter mean  
15 times with later arrival (14.9 minutes shorter per hour after 0700;  $p < 0.001$ ) and attendance for tuberculosis  
16 or ante/postnatal care (24.8 and 32.6 minutes shorter, respectively, than HIV/acute care;  $p < 0.01$ ).

17 Overall, attendees spent more of their time indoors (median 95.6% [IQR 46–100]) than outdoors (2.5% [IQR  
18 0–35]). Attendees at clinics with outdoor waiting areas spent a greater proportion (median 13.7% [IQR 1–  
19 75]) of their time outdoors.

20 In two clinics in KZN (no appointment system), occupancy densities of  $\sim 2.0$  persons/m<sup>2</sup> were observed in  
21 smaller waiting rooms during busy periods. In one clinic in WC (appointment system), occupancy density did  
22 not exceed 1.0 persons/m<sup>2</sup> despite higher overall attendance.

23 **Conclusions**

24 Longer waiting times were associated with early arrival, being female, and attending with a young child.

25 Attendees generally waited where they were asked to. Regular estimation of occupancy density (as patient  
26 flow proxy) may help staff assess for risk of infection transmission and guide intervention to reduce time  
27 spent in risky spaces.

28 **Key words**

29 tuberculosis; SARS-COV-2; COVID-19; transmission; airborne; nosocomial; infection prevention; healthcare-  
30 associated infection; health services management

31

Preprint

## 32 **Background**

---

33 Transmission of respiratory infections is a persistent problem in health care facilities, where proportions of  
34 attendees who are infectious and susceptible are likely to be higher than in other settings.<sup>[1–3]</sup> As well as  
35 creating risk for individuals attending for care, nosocomial transmission can ‘institutionally amplify’  
36 epidemics and represents a serious threat to health care worker (HCW) safety.<sup>[4–7]</sup> Pathogens such as  
37 *Mycobacterium tuberculosis (Mtb)*<sup>[8,9]</sup> and severe acute respiratory syndrome coronavirus 2 (SARS-CoV-  
38 2)<sup>[10,11]</sup> are more likely to be transmitted during close, prolonged contact and between individuals ‘sharing  
39 air’ in a poorly ventilated space.<sup>[12,13]</sup>

40 Reducing overcrowding and time spent in health care facilities are recommended infection prevention and  
41 control (IPC) measures for tuberculosis (TB) and other respiratory infections.<sup>[14,15]</sup> Several initiatives to  
42 reduce frequency of clinic visits have been tested and deployed, primarily with the intention of providing  
43 ‘differentiated care’.<sup>[16,17]</sup> However, interventions that focus on the movement of people around the facility  
44 (‘patient flow’) have received less attention than individual-focused IPC interventions, such as mask-wearing,  
45 triage, and prompt initiation of treatment,<sup>[18,19]</sup> and ‘passive’ interventions, such as structural changes to  
46 improve ventilation.<sup>[20]</sup> This is partly because of the complexity of intervening to change patient flow or  
47 waiting times in busy facilities, which can vary widely in size, layout, internal organisation, and patient  
48 load.<sup>[21]</sup> Considerations also differ for hospitals and primary health care (PHC) clinics; this article relates  
49 mainly to operations at PHC level.

### 50 **Estimating time spent in South African PHC clinics**

51 The nearly 3,500 PHC clinics in South Africa function in diverse epidemiological, political, cultural, and  
52 climactic conditions and serve individuals with a wide range of needs.<sup>[22]</sup> Long clinic waiting times have been  
53 documented over many years<sup>[23,24]</sup> and are frequently cited as a concern for patients.<sup>[25–27]</sup> The ‘Ideal Clinic’  
54 initiative, devised and scaled up by the National Department of Health since 2013, aims to enable universal  
55 standards of practice, routine measurement of relevant metrics, and fair comparisons of performance  
56 between facilities.<sup>[28]</sup> Regular estimation of waiting times is recommended by Ideal Clinic and is standard

57 practice in most clinics, though the methods used vary by province. National guidelines recommend that  
58 total visit times should be less than three hours.<sup>[29]</sup>

59 Most approaches to estimating waiting times conceptualise the patient's journey through the clinic as linear,  
60 with each individual passing through the clinic as quickly as possible while ensuring that the necessary 'touch  
61 points' are accessed. In South Africa, waiting times are usually measured through the provision of a physical  
62 card to all or a selection of patients attending on the day.<sup>[30]</sup> This card is time-stamped at the beginning and  
63 end of each interaction with a service or 'touch point' (for example, when an individual has their blood  
64 pressure measured or sees a clinician). This method is useful for estimating time spent waiting for services  
65 and the efficiency of selected processes but is less useful in assessing risk of respiratory disease transmission,  
66 as it does not describe where patients are waiting. This method also does not include non-patient attendees  
67 (e.g., parents accompanying children), any of whom may be susceptible to infection or have undiagnosed  
68 disease, nor does it allow for estimation of staff exposure to 'high risk' areas.

69 This work was conducted as part of the *Umoya omuhle* study, a multidisciplinary initiative taking a 'whole  
70 systems' approach to TB IPC in South African PHC clinics.<sup>[31]</sup> This study component aimed to develop and test  
71 a method to 1) estimate how long attendees spent in clinics, and determine why some individuals spent  
72 longer than others; 2) estimate how long attendees spend in outdoor and indoor clinic areas; 3) describe  
73 variation in occupancy of waiting areas over the clinic day; and 4) collect data for mathematical modelling of  
74 IPC interventions in clinics to reduce risk of *Mtb* transmission (McCreesh et al., in preparation).

## 75 **Methods**

---

76 The literature was reviewed to explore methods previously used to estimate waiting times, occupancy  
77 density, crowding, and patient flow (Appendix 1). The methods that allowed estimation of the broadest  
78 range of outcomes were waiting/working time surveys (either paper-based or using a real-time location  
79 system)<sup>[23,27,32]</sup> and camera-based systems.<sup>[33–35]</sup> Given the resources available to the study, as well as the  
80 ethical and logistical complications of using camera-based systems in multiple public clinics, an approach

81 based on waiting time surveys was used. As described below, unique barcodes and hand-held barcode  
82 scanners were used instead of radio-frequency identification tags<sup>[36–38]</sup> or a paper-based system.<sup>[30]</sup>

### 83 **Data collection**

84 Data were collected in clinics in KwaZulu-Natal (KZN) province (coded KZN1–6) from 22 February to 14  
85 March 2019 and in Western Cape (WC) province (coded WC1–6) from 14–22 May 2019. Clinics were visited  
86 at least once prior to data collection to provide written information, discuss concerns with managers and  
87 staff, and observe patient flow (Supplementary figure 1). On the day of data collection, a member of the  
88 research team attended the morning staff meeting to answer additional questions and issue unique  
89 barcodes to staff (including non-clinical staff). Each HCW who accepted a barcode was asked for their job  
90 title and role that day. No other personal information was collected. Cards were used that could be easily  
91 divided into two after completion to protect confidentiality (Supplementary figure 2). At the top of the card  
92 was a unique one-dimensional (1D) barcode and brief instructions. The rest of the card contained a brief  
93 questionnaire and the same 1D barcode. After questionnaire completion, the card was divided along a  
94 perforated line, the bottom part returned to the researcher, and the top part retained by the participant (or  
95 HCW) to be worn, on a lanyard, around their neck.

96 Researchers (usually 6–10 individuals, depending on the size of the clinic) were positioned at key points  
97 throughout the premises, including facility entrance(s), the window where patient files were issued (filing  
98 station), the triage/vitals station, and doorways of consultation rooms and waiting areas (Supplementary  
99 figure 3). Each researcher carried a cordless, hand-held barcode scanner (OPN-2001, Opticon Limited, United  
100 Kingdom); clinic staff in certain locations (most often consultation rooms) were also asked to carry scanners  
101 and were instructed on how and when to use them. Scanners were cleaned of all data and time-  
102 synchronised before each day's data collection.

103 All individuals attending the clinic during the hours of data collection were asked to participate. A researcher  
104 approached attendees and explained the purpose of the study and that participation was voluntary and

105 anonymous. Numbers and details of individuals who refused were not recorded because the enrolment  
106 process was time-sensitive. Individuals who agreed to participate were asked to complete the card  
107 (recording their sex, age group, and reason for attendance) and to wear the barcode until they left the clinic.  
108 If requested, the researcher completed the card on a participant's behalf. Individuals attending together had  
109 their cards stapled together before storage; this was accounted for during data entry.

110 At the beginning of data collection, all individuals already in the clinic were asked to participate and their  
111 location noted by use of a designated scanner. Simultaneously, researchers positioned at the entrance(s)  
112 asked individuals who were entering the clinic to participate. Within 60–90 minutes of commencing data  
113 collection, all individuals were offered the opportunity to participate; this sometimes took longer for busier  
114 clinics.

115 Barcode scanners at doorways and other designated 'transition points' were used to scan every person with  
116 a barcode who passed through. Scanners at filing or vitals stations (where blood pressure and other  
117 measurements were taken), consultation rooms, or at other service points were used to scan an individual's  
118 arrival and departure from that station or room. Individuals leaving the clinic had their barcode scanned as  
119 they left. For logistical reasons, data collection was stopped at 1400; at this point all individuals remaining in  
120 the clinic were scanned, with designated scanners used to note their location. A questionnaire was  
121 administered to the facility manager or nurse in charge to record information about staffing levels and other  
122 factors that may have affected service provision. The dimensions of waiting areas were measured using a  
123 Bosch PLR 40R digital laser measure (Bosch, Gerlingen, Germany; accuracy +/-2 mm).

## 124 **Data management**

125 Data from barcode scanners were transferred to a password-protected computer at the end of each day's  
126 data collection. Data from completed cards were entered into a Research Electronic Data Capture (REDCap)  
127 database,<sup>[39,40]</sup> hosted at the Africa Health Research Institute, that was programmed to assign a 'group ID' to

128 all individuals attending together (denoted by cards having been stapled together). Data from questionnaires  
129 administered to facility managers were entered into a password-protected Excel spreadsheet.

## 130 **Analysis**

131 Analysis had three strands, examining 1) time spent in clinic and factors that influenced this; 2) the  
132 proportion of each individual's time in clinic that was spent in indoor spaces (higher transmission risk) vs.  
133 outdoors (lower risk, primarily due to better ventilation), and how this varied by clinic and reason for visit;  
134 and 3) in clinics with more than one indoor waiting area, occupancy density of each indoor waiting area and  
135 how this varied over the course of the day. Supplementary table 3 describes the clinics and numbers of  
136 individuals included in each analysis.

### 137 **Time spent in clinic**

138 A large number of data were missing for arrival and departure times because several individuals were  
139 already in the clinic when data collection began or remained in the clinic when data collection ended and  
140 therefore did not have their arrival and/or departure time recorded. Multiple imputation was used to  
141 generate arrival and/or departure times for individuals in whom one or both was not recorded (see  
142 Appendix 2.2.1 for details).

143 Data were excluded from this analysis where clinic entry and exit were not recorded (because the research  
144 team was too small to monitor all entrances and exits of the clinic). Using multiply-imputed data (n = 20  
145 imputations), relationships between individual characteristics and time spent in clinic (continuous outcome)  
146 were examined using a mixed-effects linear regression model with a random effect for clinic. Province was  
147 included as fixed effect. The shape of the relationship between time of arrival and time spent in clinic was  
148 examined using fractional polynomials regression with a set of defined powers (-2, -1, -0.5, 0.5, 1, 2, and  
149  $\ln[x]$ ) and a maximum of two power terms in the model. The differences in model deviances were compared:  
150 the linear model was used if the improvement in fit was not statistically significant at  $p < 0.05$ . Province, age  
151 group, sex, and the ratio of patients to clinical staff were included in the multivariable model as a priori



152 confounders; other variables were included if they showed an important association ( $p < 0.05$ ) in the  
153 univariable model. Coefficients, representing the difference in mean time spent in clinic (in minutes), are  
154 reported with 95% confidence intervals (CIs).

### 155 **Proportion of time spent indoors vs. outdoors**

156 Non-imputed data were used from clinics where a scanner had been positioned at all facility entrance/s and  
157 all indoor/outdoor doorways. Individuals with a total captured visit time of less than five minutes were  
158 excluded, as they were considered likely to have discarded their barcode. Each individual's pathway through  
159 the clinic was mapped: for each barcode scan recorded, the individual's location in the time preceding the  
160 scan was categorised as 'indoors', 'outdoors', or 'unknown' (if they appeared to have moved between two  
161 unconnected locations, indicating a missing barcode scan) based on the location of their previous scan. Total  
162 time spent in each type of location (as a proportion of the individual's overall recorded time in clinic) was  
163 summarised by clinic and by self-reported reason for clinic attendance.

### 164 **Occupancy density**

165 Non-imputed data were used from clinics that had more than one indoor waiting area and where a barcode  
166 scanner had been positioned at all entrances and exits of at least two waiting areas. Data were divided into  
167 10 second slices and entries and exits from each demarcated space noted for each 10 second period; the  
168 number of individuals within a space at the end of each 10 second period was divided by the floor area and  
169 volume of that space to give the occupancy density (in persons/m<sup>2</sup> and persons/m<sup>3</sup>, respectively) for that 10  
170 second period.

171 Analyses were conducted in Stata versions 14 and 16 (Statacorp, College Station, Tx). Figures were created  
172 using Stata, Microsoft PowerPoint, Microsoft Excel, and Inkscape v0.92.4.<sup>[41]</sup>

### 173 **Ethical considerations**

174 Identifiable data were not collected from participating individuals; written informed consent was not  
175 requested. This study received ethical approval from the Biomedical Research Ethics Committee of the

176 University of KwaZulu-Natal (ref. BE082/18), the Human Research Ethics Committee of the Faculty of Health  
177 Sciences of the University of Cape Town (ref. 165/2018), the Research Ethics Committee of Queen Margaret  
178 University (ref. REP 0233), and the Observational/Interventions Research Ethics Committee of the London  
179 School of Hygiene & Tropical Medicine (ref. 14872).

## 180 **Results**

---

181 Patient flow in study clinics was broadly organised around three key steps in the following order: 1) patient  
182 registration (file collection); 2) vital signs; and 3) HCW consultation. Individuals usually waited in different  
183 parts of the clinics for each step. The pathway taken depended on the reason for visit (many individuals also  
184 visited one or more of the in-clinic pharmacy, phlebotomist, and other specialist practitioners) and was  
185 implemented variably in clinics based on their size, design, and organisation of care. In most clinics,  
186 individuals attending for TB care (i.e., those being investigated for TB or taking anti-TB treatment) were ‘fast-  
187 tracked’ and skipped steps 1 and 2 above. Clinics varied widely in size, population served, services offered,  
188 and organisation of care. Importantly, some clinics routinely asked patients to wait in covered outdoor  
189 waiting areas, whereas others had only indoor areas. All clinics in WC and no clinics in KZN operated a date-  
190 time appointment system for at least some patients (Supplementary table 5); no clinics had an active queue  
191 management system.

192 Twelve datasets were available for analysis from 11 clinics: six in KZN and five in WC (Table 1; clinic WC4  
193 could not be visited for logistical reasons and clinic KZN1 was visited for a second time to attempt better  
194 coverage). Data were collected for 2,903 patients and visitors: 1,925 (66.3%) in KZN and 978 (33.7%) in WC).  
195 Across clinics, a median 70% (interquartile range [IQR] 69%–74%) of clinic attendees were female. Most  
196 individual characteristics were similar between provinces, with the only large differences seen in ‘main  
197 reason for clinic visit’: in KZN clinics, a median 32.6% of clinic attendees reported attending for HIV care or  
198 antiretroviral therapy (ART), compared with a median 3.5% in WC clinics. This was thought likely due, at least  
199 in part, to an error during data collection in WC clinics, with ‘acute care’ consistently incorrectly marked by  
200 those attending for HIV care (49% in WC vs. 29% in KZN). Because no identifying details of individuals were

201 collected, this could not be rectified, and the two categories were combined in analysis (but are shown  
202 separately in Table 1).

203 [Table 1. Characteristics of clinics, individuals attending, and staff working on the day of data collection, overall](#)  
204 [and by province \(N = 12 exercises at 11 clinics; N = 2,903 attendees\)](#)

### 205 **Time spent in clinics**

206 Data were excluded from clinic KZN4 (n = 269) as all entrances and exits had not been monitored. Data from  
207 2,634 individuals attending 10 clinics (11 data collection exercises) underwent multiple imputation and were  
208 included in this analysis (1,063 [40%] missing time of arrival and 934 [35%] missing time of departure;  
209 Supplementary table 4). Overall median time spent in clinic was 2 hours 36 minutes (IQR 01:36–3:43). This  
210 was similar in each province (KZN 02:33 [IQR 01:35–3:40; n = 1,656]; WC 02:42 [IQR 01:37–03:49; n = 978]).  
211 Visit durations by demographics and reason for visit are provided in Supplementary table 6.

212 In univariable analysis (Table 2), there was strong evidence of an increase in mean time spent in clinic for  
213 individuals who were female (p <0.001), attending with a baby (p <0.001), or attending with ≥1 other person  
214 (p <0.01). There was also strong evidence of differences by reason for visit (p <0.01): individuals attending  
215 for TB care and ante/post-natal care spent the shortest time in clinic. Mean time in clinic reduced by ~15  
216 minutes for each hour that arrival was delayed after 0700 (p <0.001).

217 [Table 2. Results of univariable and multivariable mixed-effects linear regression using imputed data, showing](#)  
218 [effects of different factors on total time spent in clinic \(n = 2,634; 11 exercises in 10 clinics\)](#)

219 In multivariable analysis, longer mean times remained associated with being female (13.5 [95% CI 6–21]  
220 minutes longer than males) and attending with a baby (18.8 [95% CI 8–30] minutes longer than those  
221 attending without). Reason for visit (p <0.01) and time of arrival (p <0.001) also remained important: those  
222 attending for TB care or ante/post-natal care spent a mean 24.8 (95% CI 9–41) minutes and 32.6 (95% CI 11–  
223 54) minutes less in clinic, respectively, than those attending for HIV/acute care, and mean time in clinic

224 reduced by 14.9 (95% CI 13–17) minutes for each hour that arrival was delayed after 0700. The results of the  
225 fractional polynomial models showed that the linear model adequately described the relationship between  
226 the time at clinic and arrival time (Appendix 3.2.1).

### 227 **Proportion of time spent indoors vs. outdoors**

228 The 2,190 clinic attendees included in this analysis ( $\geq 5$  minutes captured; 10 visits; 9 clinics) spent a median  
229 95.6% (IQR 45.6–100) of their time indoors and a median 2.5% (IQR 0–35.3) outdoors (Supplementary table  
230 7), with the remainder in unknown locations. This varied by clinic (Figure 1A): in four clinics with an outdoor  
231 waiting area that was used as part of normal patient flow, individuals spent a median 13.7% (IQR 1.4–74.5;  $n$   
232 = 1,362) of their time outdoors, compared with a median 0% (IQR 0–1.4;  $n$  = 828) outdoors among attendees  
233 at the five clinics without an outdoor waiting area or where the outdoor area was not used.

234 [Figure 1. Box and whiskers plots showing proportions of time spent indoors and outdoors, by clinic \(panel A\)](#)  
235 [and for two visits to clinic KZN1, by selected reasons for visit \(panel B\)](#)

236 In clinics with outdoor waiting areas, the wide IQR (1.4–74.5) for estimated time spent outdoors reflects the  
237 considerable variation seen among attendees to clinic KZN1, where the outdoor waiting area is used only by  
238 individuals in the ‘chronic’ stream. For example, in the second exercise at KZN1, individuals attending for  
239 ‘acute’ care spent a median 89.8% (IQR 18.9–98.3;  $n$  = 118) of their time indoors, compared with those  
240 attending for HIV care, who spent a median 98.6% (IQR 92.8–100;  $n$  = 125) of their time *outdoors* (Figure 1B).  
241 Estimates by reported reason for visit for each clinic are provided in Supplementary table 8.

### 242 **Occupancy density of indoor spaces**

243 Data from three clinics were sufficient to estimate occupancy density of at least three indoor spaces (Figure  
244 2). In clinic KZN6 (Figure 2, panel 2), the occupancy density of area A consistently declined over the course of  
245 the day as individuals moved into areas B and C. Because of its relatively large volume, the occupancy  
246 density of area A never went above 0.9 persons/m<sup>2</sup>. In contrast, in the smallest space (area C), occupancy

247 peaked at around 1200, with density around or above 2.0 persons/m<sup>2</sup> from 1000–1200. In clinic KZN2 (panel  
248 3), the smaller overall numbers of attendees meant that although the spaces are of similar size to clinic  
249 KZN6, density was generally lower. Overall occupancy was highest in clinic WC1, but the larger waiting  
250 spaces in this clinic meant that occupancy density was never higher than 1.0 persons/m<sup>2</sup> (panel 4), even in  
251 the smallest space. Clinic WC1 also had a well-functioning date-time appointment system, which is likely why  
252 occupancy of these spaces was more evenly distributed over the day compared with the other two clinics.

253 [Figure 2. Line graph and heat maps showing, respectively, total numbers of people in and approximate](#)  
254 [occupancy density \(in persons/m<sup>2</sup>\) of three indoor waiting areas in each of clinics KZN2, KZN6, and WC1](#)  
255 [between 0800 and 1345](#)

256 Occupancy density by room volume (persons/m<sup>3</sup>) was calculated for the same spaces (Supplementary table  
257 9). This is a more relevant measure of occupancy density for predominantly airborne pathogens, such as  
258 *Mtb*. All assessed waiting spaces in clinics KZN2 and KZN6 had relatively low ceilings (maximum height 2.5–  
259 2.7 m) and occupancy density was higher (median 0.21–1.02 persons/m<sup>3</sup>) than in spaces in clinic WC1, where  
260 ceilings were higher (maximum height 4.2–5.9 m; median occupancy density 0.10–0.14 persons/m<sup>3</sup>).

## 261 Discussion

---

262 We tracked 2,903 clinic attendees at 11 PHC clinics in two provinces of South Africa. Median time spent in  
263 clinic was 2 hours 36 minutes (IQR 01:36–03:43). People who arrived early in the morning spent longer in  
264 clinic, as did women and individuals attending with babies. Individuals attending for TB and maternal care  
265 spent less time in clinic. People attending clinics that had outdoor covered waiting areas spent more of their  
266 visit time outdoors, though differences were also seen between individuals attending the same clinic based  
267 on how care was organised for different ‘streams’. In clinics with multiple indoor waiting areas, occupancy  
268 was often not distributed evenly between areas or over time; periods of high occupancy density (>2  
269 persons/m<sup>2</sup>) were observed in smaller waiting areas.

270 Time spent in clinic was below the national target maximum time<sup>[29]</sup> of three hours for around 60% of clinic  
271 attendees (ranging from 48% to 82% across clinics), but was over four hours for around 20% (range 7%–37%)  
272 and over five hours for around 9% (range 4%–27%). Detailed comparison with other studies is challenging,  
273 given the variation in operational characteristics of PHC clinics and methods used (Supplementary table 10).  
274 On crude comparison, median time spent in clinic in our study was slightly higher than seen in recent South  
275 African studies (Stime et al. [urban KZN, 2016],<sup>[24]</sup> median 01:48 for sexually transmitted infection care and  
276 median 02:46 for HIV care; Egbujie et al. [rural KZN, 2014],<sup>[42]</sup> median 01:56 in nine PHCs) and slightly lower  
277 than seen in older studies (Bachmann and Barron [urban WC, 1997],<sup>[23]</sup> median 2.6 hours and 4.1 hours for  
278 ‘preventive’ and ‘curative’ care, respectively). Patterns in our data were also observed by previous  
279 investigators, including longer times for individuals who arrived earlier<sup>[23,24,42]</sup> and the early arrival of the  
280 majority of attendees, often before the clinic opened.<sup>[30]</sup> A higher patient to nurse ratio was strongly  
281 associated with longer waiting times in the study by Egbujie et al.,<sup>[42]</sup> but not in our study, possibly because  
282 our estimates of staff numbers included all clinical staff, not only nurses. We are not aware of any previous  
283 studies that estimated proportions of time spent indoors vs. outdoors or the occupancy density of waiting  
284 areas.

285 Early arrival and queueing outside clinics is common in South Africa. It is influenced by the frequent absence  
286 of appointment and queue management systems; the organisation of services around the ‘morning rush’;  
287 the lack of incentives for staff to change working patterns; and complex factors outside the health system,  
288 such as the availability of public transport and the community’s trust in the system. Detailed exploration of  
289 these issues is beyond the scope of this paper, but some discussion can be found in the report of an *Umoya*  
290 *omuhle* workshop on patient flow that involved a range of South African experts.<sup>[43]</sup>

291 The observed between-clinic and within-clinic variation in proportions of time spent indoors versus outdoors  
292 reflects the importance of both clinic design and the organisation of care in moderating the risk of  
293 respiratory disease transmission in these settings. The existence of an outdoor, ‘low risk’ waiting area is of  
294 little benefit if most individuals spend most of their time in poorly ventilated indoor spaces. However, the

295 use of outdoor spaces may be less feasible in areas with lower temperatures. Thermal comfort and user  
296 acceptability are important considerations when planning changes to patient flow.

297 In clinics where it may be impractical to wait outdoors, risk indoors can be moderated through more even  
298 distribution of occupancy throughout the available space. For example, during the busiest period in a small  
299 clinic like KZN6 (106 people in the clinic [Figure 3]), restricting occupancy of the smaller waiting spaces (B  
300 and C) to 20 and 16 individuals, respectively, would have left 70 individuals in the largest space and resulted  
301 in an occupancy density of around 1 person/m<sup>2</sup> in all three spaces. This is in line with 2014 WHO guidelines  
302 for spatial separation as part of IPC for ‘epidemic- and pandemic-prone acute respiratory infections’, which  
303 recommend maintaining a distance of at least 1 metre between patients.<sup>[15]</sup>

304 South African draft national guidelines<sup>[44]</sup> suggest a number of potential interventions to reduce waiting  
305 times and improve patient flow. Some have been tested in South Africa and other similar settings and are  
306 discussed briefly below.

### 307 **Potential interventions**

308 Interventions to improve flow can be classified broadly as targeting two domains: 1) reducing the number of  
309 individuals overall and/or in particular spaces; and 2) reducing the time spent by attendees overall and/or in  
310 particular spaces. Most measures affect both domains, sometimes indirectly.

311 Initiatives to reduce numbers of attendees include the Central Chronic Medicine Dispensing and Distribution  
312 (CCMDD) system, where certain groups of patients collect chronic medication from community-based  
313 sites,<sup>[17,45]</sup> and reducing the frequency of routine clinic visits for certain conditions, for example by increasing  
314 the amount of medication provided (trials among people taking ART have shown promising results).<sup>[16,46–49]</sup>

315 Measures to improve the overall efficiency of the clinic aim to move people through the facility as quickly as  
316 possible and to reduce the likelihood of bottlenecks in flow. These include holistic approaches, such as

317 'Lean',<sup>[50,51]</sup> value-stream mapping,<sup>[52]</sup> and other quality improvement methods,<sup>[53]</sup> as well as more targeted  
318 changes in staffing or resources at specific points in clinical pathways.<sup>[24]</sup>

319 Streaming and triage interventions focus on the movement of people once they enter a health facility. In line  
320 with Ideal Clinic guidance,<sup>[28]</sup> every clinic in our study operated a streaming system that allowed people  
321 attending for TB care to bypass many of the steps in the pathway. This is partly intended to reduce the risk of  
322 *Mtb* transmission and is made feasible by the relatively small numbers of people treated for TB at each clinic  
323 and because no additional triage process is required. Triage (broadly defined as the process of prioritising  
324 patients for care based on their needs)<sup>[54]</sup> has also been shown to reduce waiting times in a hospital in South  
325 Africa, though it was less effective when used in two PHC clinics.<sup>[55,56]</sup> Effective triage can be challenging and  
326 resource-intensive to sustain,<sup>[57]</sup> and sub-optimal implementation of symptom-based triage for TB IPC has  
327 been documented by several studies.<sup>[58-61]</sup> Active queue management has also been tested: a qualitative  
328 study around the use of a 'Fast Queue' in clinics in KZN found that the use of multiple, managed queues was  
329 generally well-received by attendees, particularly if accompanied by smooth (i.e., unidirectional) flow and  
330 effective communication with HCWs, though there were still those who experienced long waiting times.<sup>[62]</sup>

331 Date-time appointment systems have been most widely used to reduce both numbers of people and time  
332 spent in clinics. Appointment systems have been shown to reduce waiting times in outpatient ART clinics in  
333 Ethiopia<sup>[63]</sup> and Kenya,<sup>[64]</sup> antenatal clinics in Mozambique,<sup>[65]</sup> and PHC clinics in South Africa,<sup>[42]</sup> the last as  
334 part of a suite of interventions that included streaming, training, and infrastructure upgrades. Investigators  
335 describe generally encouraging results, though they also highlight the considerable challenges involved in  
336 standardising implementation at facilities that are differently organised. During the *Umoya omuhle* patient  
337 flow workshop, discussions around appointment system implementation emphasised the importance of  
338 support processes (such as pre-retrieval of files) and technological infrastructure in sustaining this complex  
339 intervention.<sup>[43]</sup>



## 340 **Recommendations**

341 Building flexibility into the organisation of flow would allow a clinic to adapt to and absorb periods of  
342 increased traffic without putting patients or staff at risk; for example, by moving people from an  
343 overcrowded area to one that is relatively empty, or by activating ‘overflow’ covered outdoor waiting areas.  
344 However, any such initiative would require 1) a queue management system, to ensure that individuals  
345 moved between areas are not placed at a disadvantage, and 2) clinic managers to have a) easy access to  
346 real-time information about flow and b) the resources and freedom to try to improve flow.<sup>[27]</sup> Patient flow  
347 can be difficult to measure quickly: previous published descriptions focus on largely qualitative descriptions  
348 of observed movement patterns.<sup>[23,66]</sup> Occupancy density, however, is easy to measure (e.g., through manual  
349 headcounts) and, measured periodically across a clinic, could be used as a proxy estimate for flow. We  
350 suggest that regular, light-touch (‘diagnostic’) approximation of this metric may have numerous potential  
351 direct and indirect benefits, including improved efficiency; shorter waiting times; better clinic-specific  
352 decision-making; and a strengthened relationship between the clinic and its community.<sup>[27,43,67]</sup>

353 Importantly, interventions intended to reduce attendance and waiting times may adversely affect the flow  
354 around the which the clinic was designed and may therefore increase the rate of transmission to an  
355 individual during the time they do spend in the clinic. Most clinics are designed with waiting areas that get  
356 successively smaller as patients move through the pathway; as pathways diverge, patients ‘diffuse’ through  
357 the clinic and one would expect occupancy to be lower. However, if the overall ‘patient load’ is greater than  
358 the capacity of the clinic, or if different stages of the pathway are variably efficient, or if certain attendees  
359 (e.g., those with appointments) are allowed to skip parts of the queue, bottlenecks can arise in areas that  
360 are designed to hold fewer people, leading to higher than optimal occupancy of ‘downstream’ areas and/or  
361 under-use of ‘upstream’ areas. Interventions to improve flow and reduce waiting times are acutely  
362 vulnerable to achieving “many small successes and one big failure”<sup>[68]</sup> and should be undertaken with careful  
363 consideration of potential effects on other parts of the pathway, possible increases in risk of disease

364 transmission, and adjustments that may be needed in resource allocation, ventilation, and the organisation  
365 of care.

## 366 **Limitations**

367 The method employed in this study was relatively inexpensive, built on methods already widely used in  
368 South African PHCs, and included elements that could be incorporated into routine estimation of waiting  
369 times and flow. Numbers of individuals who declined to participate were not recorded and we were  
370 therefore unable to assess for selection bias introduced by the enrolment process. Starting data collection  
371 after some individuals had arrived and stopping data collection at 1400 (because of logistical restrictions)  
372 reduced the numbers of individuals whose data could be used to estimate total waiting time, requiring the  
373 use of multiple imputation to deal with missing data. Multiple imputation assumes that the data are missing  
374 at random, which means that the observed values can be used to predict the missing values. However, if the  
375 assumption is incorrect, the results may be biased. Furthermore, the validity of results derived from multiply  
376 imputed data depend on the appropriateness of the imputation model. Future exercises should, at a  
377 minimum, continue to record clinic exits for as long as possible. Because of variability between and within  
378 clinics, and because data were collected on only one day from almost all clinics, estimates presented here  
379 should not be considered representative of the two provinces, types of clinics, or the clinics themselves. In  
380 busy clinics in particular, many attendees' barcodes were not scanned every time at every scanning point,  
381 and estimates of waiting area occupancy and time spent indoors or outdoors should be treated as  
382 approximations. Even so, our headline findings are plausible and consistent with those from other studies.

## 383 **Conclusions**

384 Measuring patient flow is important for estimating clinic efficiency and disease transmission risk. In our  
385 study, women, individuals arriving early, and those attending with young children spent longer at clinic.  
386 Attendees generally waited where they were asked to: using outdoor waiting areas as part of patient  
387 pathways increased the proportion of visit time spent outdoors. Occupancy of indoor spaces varied  
388 considerably over the day and people often were not distributed evenly throughout the available space.

389 Regular, light-touch estimation of occupancy density (as a proxy for patient flow) may help staff to assess for  
390 the risk of nosocomial transmission and guide the use of interventions to reduce time spent in risky spaces.

## 391 **List of abbreviations**

---

392 ART: antiretroviral therapy; CI: confidence interval; HCW: health care worker; hh: hours; IPC: infection  
393 prevention and control; IQR: interquartile range; KZN: Kwa-Zulu Natal; mm: minutes; *Mtb*: *Mycobacterium*  
394 *tuberculosis*; NCD: noncommunicable disease; PHC: primary health care; REDCap: Research Electronic Data  
395 Capture; ref.: reference; SARS-COV-2: severe acute respiratory syndrome coronavirus 2; TB: tuberculosis;  
396 WC: Western Cape

## 397 **Declarations**

---

### 398 **Ethics approval and consent to participate**

399 Identifiable data were not collected from participating individuals and written informed consent was  
400 therefore not requested. This study received ethical approval from the Biomedical Research Ethics  
401 Committee of the University of KwaZulu-Natal (ref. BE082/18), the Human Research Ethics Committee of the  
402 Faculty of Health Sciences of the University of Cape Town (ref. 165/2018), the Research Ethics Committee of  
403 Queen Margaret University (ref. REP 0233), and the Observational/Interventions Research Ethics Committee  
404 of the London School of Hygiene & Tropical Medicine (ref. 14872).

### 405 **Consent for publication**

406 Not applicable.

### 407 **Availability of data and materials**

408 Data will be available from LSHTM DataCompass. Questionnaires used are provided in the supplementary  
409 material.

## 410 **Competing interests**

411 The authors declare that they have no competing interests. All authors have completed the ICMJE uniform  
412 disclosure form at [www.icmje.org](http://www.icmje.org) and declare: financial support from the Economic and Social Research  
413 Council (UK) and from The Bloomsbury SET (Research England) for the submitted work; no financial  
414 relationships with any organizations that might have an interest in the submitted work in the previous three  
415 years; and no other relationships or activities that could appear to have influenced the submitted work.

## 416 **Funding**

417 The support of the Economic and Social Research Council (UK) is gratefully acknowledged. The *Umoya*  
418 *omuhle* study is funded by the Antimicrobial Resistance Cross Council Initiative supported by the seven  
419 research councils in partnership with other funders including support from the GCRF (ref. ES/P008011/1).  
420 Additional support was received from The Bloomsbury SET (Research England; ref. CCF17-7779). TAY is  
421 funded via an NIHR Academic Clinical Fellowship and acknowledges support from the NIHR Imperial  
422 Biomedical Research Centre.

## 423 **Authors' contributions**

|                                       |                               |
|---------------------------------------|-------------------------------|
| <b>Conceptualisation</b>              | ADG, ASK, AV, HM, KK, NM, TAY |
| <b>Methodology</b>                    | ADG, ASK, AV, NM              |
| <b>Formal analysis</b>                | ASK, KB, NM                   |
| <b>Investigation</b>                  | ADG, ASK, IIK, IG             |
| <b>Resources</b>                      | ADG, ASK, IG, NM              |
| <b>Data curation</b>                  | ASK                           |
| <b>Writing – original draft</b>       | ASK                           |
| <b>Writing – review &amp; editing</b> | All authors                   |
| <b>Visualisation</b>                  | ASK                           |
| <b>Supervision</b>                    | ADG, AV, KB                   |
| <b>Project administration</b>         | ADG, ASK, IG                  |
| <b>Funding acquisition</b>            | ADG, KK                       |

424

## 425 Acknowledgments

426 Our thanks to the managers, staff, and attendees at all study clinics for their participation, enthusiasm, and  
427 patience; to Dr Bart Willems for guidance around methods; to Dr Gavin Reagon for additional advice,  
428 particularly around appointment systems; and to all participants of the *Umoya omuhle* participatory  
429 workshop on waiting times and patient flow,<sup>[43]</sup> held in South Africa in August 2019.

430 Special thanks to teams in Somkhele and Cape Town who were involved in data collection: Dr Amy Burdzik,  
431 Anathi Mngxekeza, Awethu Gawulekapa, Duduzile Mkhwanazi, Emmerencia Gumede, Godfrey Manuel,  
432 Nompilo Ndlela, Nonhlanhla Madlopha, Nozipho Mthethwa, Phumzile Nywagi, Precious Mathenjwa,  
433 Samantha Moyo, Seonaid Kabiah, Sinead Murphy, Siphokazi Adonisi, Siphosethu Titise, Sithembiso Luthuli,  
434 Sphiwe Mthethwa, Suzanne Key, Tamia Jansen, Thandekile Nene, Yolanda Qeja, Yutu Dlamini, and Zinhle  
435 Mkhwanazi.

436 *Umoya omuhle* was a multidisciplinary initiative involving several institutions and a team of over 100 people  
437 (Supplementary table 11).

## 438 References

---

- 439 1 McCreech N, Grant AD, Yates TA, Karat AS, White RG. Tuberculosis from transmission in clinics in high HIV  
440 settings may be far higher than contact data suggest. *Int J Tuberc Lung Dis.* 2020;24(4):403–8.
- 441 2 Gandhi NR, Weissman D, Moodley P, et al. Nosocomial Transmission of Extensively Drug-Resistant Tuberculosis  
442 in a Rural Hospital in South Africa. *J Infect Dis.* 2013;207(1):9–17.
- 443 3 Lessells R, Moosa Y, de Oliveira T. Report into a nosocomial outbreak of coronavirus disease 2019 (COVID-19) at  
444 Netcare St. Augustine’s Hospital. 2020.  
445 [https://www.krisp.org.za/manuscripts/StAugustinesHospitalOutbreakInvestigation\\_FinalReport\\_15may2020\\_c](https://www.krisp.org.za/manuscripts/StAugustinesHospitalOutbreakInvestigation_FinalReport_15may2020_comp.pdf)  
446 [omp.pdf](https://www.krisp.org.za/manuscripts/StAugustinesHospitalOutbreakInvestigation_FinalReport_15may2020_comp.pdf) (accessed 2021 Jan 26)
- 447 4 Basu S, Stuckler D, McKee M. Addressing Institutional Amplifiers in the Dynamics and Control of Tuberculosis  
448 Epidemics. *Am J Trop Med Hyg.* 2011;84(1):30–7.
- 449 5 Baussano I, Nunn P, Williams B, Pivetta E, Bugiani M, Scano F. Tuberculosis among health care workers. *Emerg*  
450 *Infect Dis.* 2011;17(3):488–94.
- 451 6 Grobler L, Mehtar S, Dheda K, et al. The epidemiology of tuberculosis in health care workers in South Africa: a  
452 systematic review. *BMC Health Serv Res.* 2016;16(1):416.
- 453 7 Abbas M, Robalo Nunes T, Martischang R, et al. Nosocomial transmission and outbreaks of coronavirus disease  
454 2019: the need to protect both patients and healthcare workers. *Antimicrob Resist Infect Control.* 2021;10(1):7.
- 455 8 Churchyard G, Kim P, Shah NS, et al. What We Know About Tuberculosis Transmission: An Overview. *J Infect Dis.*  
456 2017;216(suppl\_6):S629–35.

- 457 9 Yates TA, Khan PY, Knight GM, et al. The transmission of Mycobacterium tuberculosis in high burden settings.  
458 *Lancet Infect Dis.* 2016;16(2):227–38.
- 459 10 Delikhoon M, Guzman MI, Nabizadeh R, Norouzian Baghani A. Modes of Transmission of Severe Acute  
460 Respiratory Syndrome-Coronavirus-2 (SARS-CoV-2) and Factors Influencing on the Airborne Transmission: A  
461 Review. *Int J Environ Res Public Health.* 2021;18(2).
- 462 11 Kwon K-S, Park J-I, Park YJ, Jung D-M, Ryu K-W, Lee J-H. Evidence of Long-Distance Droplet Transmission of  
463 SARS-CoV-2 by Direct Air Flow in a Restaurant in Korea. *J Korean Med Sci.* 2020;35(46).
- 464 12 Yates TA, Tanser F, Abubakar I. Plan Beta for tuberculosis: it's time to think seriously about poorly ventilated  
465 congregate settings. *Int J Tuberc Lung Dis.* 2016;20(1):5–10.
- 466 13 Fennelly KP. Particle sizes of infectious aerosols: implications for infection control. *Lancet Respir Med.*  
467 2020;8(9):914–24.
- 468 14 World Health Organization. WHO policy on TB infection control in health-care facilities, congregate settings, and  
469 households. 2009. <http://www.ncbi.nlm.nih.gov/books/NBK179249/> (accessed 2019 Dec 1)
- 470 15 World Health Organization. Infection prevention and control of epidemic- and pandemic-prone acute  
471 respiratory infections in health care: WHO guidelines. 2014.  
472 [http://apps.who.int/iris/bitstream/10665/112656/1/9789241507134\\_eng.pdf?ua=1](http://apps.who.int/iris/bitstream/10665/112656/1/9789241507134_eng.pdf?ua=1) (accessed 2020 Jul 30)
- 473 16 Luque-Fernandez MA, Van Cutsem G, Goemaere E, et al. Effectiveness of patient adherence groups as a model  
474 of care for stable patients on antiretroviral therapy in Khayelitsha, Cape Town, South Africa. *PLoS One.*  
475 2013;8(2):e56088.
- 476 17 South Africa National Department of Health. Get Checked Go Collect: CCMDD.  
477 <https://getcheckedgocollect.org.za/ccmdd/> (accessed 2021 Feb 8)
- 478 18 Fox GJ, Redwood L, Chang V, Ho J. The effectiveness of individual and environmental infection control measures  
479 in reducing the transmission of Mycobacterium tuberculosis: a systematic review. *Clin Infect Dis.* 2020;72(1):15–  
480 26.
- 481 19 Karat AS, Gregg M, Barton HE, et al. Evidence for the use of triage, respiratory isolation, and effective treatment  
482 to reduce the transmission of Mycobacterium tuberculosis in health care settings: a systematic review. *Clin*  
483 *Infect Dis.* 2020;72(1):155–72.
- 484 20 Cox H, Escombe R, McDermid C, et al. Wind-Driven Roof Turbines: A Novel Way to Improve Ventilation for TB  
485 Infection Control in Health Facilities. *PLoS ONE.* 2012;7(1).
- 486 21 Hunter JR, Asmall S, Ntshengedzeni MR, Chandran TM, Tucker J-M, Mokgalagadi Y. The Ideal Clinic in South  
487 Africa: progress and challenges in implementation. *South African Health Review* 2017. 2017.  
488 [https://www.hst.org.za/publications/South%20African%20Health%20Reviews/11\\_The%20Ideal%20Clinic%20in](https://www.hst.org.za/publications/South%20African%20Health%20Reviews/11_The%20Ideal%20Clinic%20in%20South%20Africa_progress%20and%20challenges%20in%20implementation.pdf)  
489 [%20South%20Africa\\_progress%20and%20challenges%20in%20implementation.pdf](https://www.hst.org.za/publications/South%20African%20Health%20Reviews/11_The%20Ideal%20Clinic%20in%20South%20Africa_progress%20and%20challenges%20in%20implementation.pdf) (accessed 2020 Jul 30)
- 490 22 Health Systems Trust. South African District Health Barometer, 2019/20. 2020.  
491 [https://www.hst.org.za/publications/District%20Health%20Barometers/DHB%202019-](https://www.hst.org.za/publications/District%20Health%20Barometers/DHB%202019-20%20Complete%20Book.pdf)  
492 [20%20Complete%20Book.pdf](https://www.hst.org.za/publications/District%20Health%20Barometers/DHB%202019-20%20Complete%20Book.pdf) (accessed 2021 Jan 26)
- 493 23 Bachmann MO, Barron P. Why wait so long for child care? An analysis of waits, queues and work in a South  
494 African urban health centre. *Trop Doct.* 1997;27(1):34–8.
- 495 24 Stime KJ, Garrett N, Sookrajh Y, et al. Clinic flow for STI, HIV, and TB patients in an urban infectious disease clinic  
496 offering point-of-care testing services in Durban, South Africa. *BMC Health Serv Res.* 2018;18(1):363.
- 497 25 Naidoo K, van Wyk J. What the elderly experience and expect from primary care services in KwaZulu-Natal,  
498 South Africa. *Afr J Prim Health Care Fam Med.* 2019;11(1).
- 499 26 Voce A, Zwama G, MacGregor H, Grant AD, Kielmann K. Compromised TB infection prevention and control in  
500 south African primary care facilities: a whole systems perspective. *50th World Conf Lung Health Int Union*  
501 *Tuberc Lung Dis.* 2019;Abstract PS-37-911-02.
- 502 27 Daniels J, Zweigenthal V, Reagon G. Assessing the impact of a waiting time survey on reducing waiting times in  
503 urban primary care clinics in Cape Town, South Africa. *J Public Health Afr.* 2017;8:23–9.

- 504 28 South Africa National Department of Health. Ideal Clinic Integrated Clinical Services Management Manual.  
505 [https://www.idealhealthfacility.org.za/docs/Integrated%20Clinical%20Services%20Management%20%20Manu](https://www.idealhealthfacility.org.za/docs/Integrated%20Clinical%20Services%20Management%20%20Manual%205th%20June%20FINAL.pdf)  
506 [al%205th%20June%20FINAL.pdf](https://www.idealhealthfacility.org.za/docs/Integrated%20Clinical%20Services%20Management%20%20Manual%205th%20June%20FINAL.pdf) (accessed 2010 Jul 2)
- 507 29 South Africa National Department of Health. National policy on management of patient waiting time in out  
508 patient departments. 2015.  
509 [https://www.idealhealthfacility.org.za/docs/policies/Patient%20Waiting%20time%20Policy%2014%20Novembe](https://www.idealhealthfacility.org.za/docs/policies/Patient%20Waiting%20time%20Policy%2014%20November%202016%20PDF.pdf)  
510 [r%202016%20PDF.pdf](https://www.idealhealthfacility.org.za/docs/policies/Patient%20Waiting%20time%20Policy%2014%20November%202016%20PDF.pdf) (accessed 2020 Jul 30)
- 511 30 Reagon G, Igumbor E. Strengthening Health Systems through training of Health Care Providers in the conduct of  
512 Routine Waiting Time and System Efficiency Surveys. *Stud Health Technol Inform.* 2010;590–4.
- 513 31 Kielmann K, Karat AS, Zwama G, et al. Tuberculosis infection prevention and control: why we need a whole  
514 systems approach. *BMC Infect Dis Poverty.* 2020;9(1):56.
- 515 32 Kamel Boulos MN, Berry G. Real-time locating systems (RTLS) in healthcare: a condensed primer. *Int J Health*  
516 *Geogr.* 2012;11(1):25.
- 517 33 Ryan D, Denman S, Fookes C, Sridharan S. Crowd Counting Using Group Tracking and Local Features. In: *2010*  
518 *7th IEEE International Conference on Advanced Video and Signal Based Surveillance.* 2010. p. 218–24.
- 519 34 Rahmalan H, Nixon MS, Carter JN. On crowd density estimation for surveillance. In: *IET Conference on Crime and*  
520 *Security.* 2006. p. 540–5.
- 521 35 Rodriguez M, Laptev I, Sivic J, Audibert J-Y. Density-aware person detection and tracking in crowds. In: *2011*  
522 *International Conference on Computer Vision.* 2011. p. 2423–30.
- 523 36 Perez-Diaz-de-Cerio D, Hernández-Solana Á, Valdovinos A, Valenzuela J. A Low-Cost Tracking System for  
524 Running Race Applications Based on Bluetooth Low Energy Technology. *Sensors.* 2018;18(3):922.
- 525 37 Fosso Wamba S. Guest Editorial for the Special Issue on RFID-enabled Healthcare: Applications, Issues and  
526 Benefits. *J Med Syst.* 2012;36(6):3389–92.
- 527 38 Singman EL, Haberman CV, Appelbaum J, et al. Electronic Tracking of Patients in an Outpatient Ophthalmology  
528 Clinic to Improve Efficient Flow: A Feasibility Analysis and Benchmarking Study. *Qual Manag Health Care.*  
529 2015;24(4):190–9.
- 530 39 Harris PA, Taylor R, Thielke R, Payne J, Gonzalez N, Conde JG. Research electronic data capture (REDCap)—A  
531 metadata-driven methodology and workflow process for providing translational research informatics support. *J*  
532 *Biomed Inform.* 2009;42(2):377–81.
- 533 40 Harris PA, Taylor R, Minor BL, et al. The REDCap consortium: Building an international community of software  
534 platform partners. *J Biomed Inform.* 2019;95:103208.
- 535 41 The Inkscape Project. Inkscape. <https://inkscape.org/> (accessed 2021 Jun 1)
- 536 42 Egbujie BA, Grimwood A, Mothibi-Wabafor EC, et al. Impact of ‘Ideal Clinic’ implementation on patient waiting  
537 time in primary healthcare clinics in KwaZulu-Natal Province, South Africa: A before-and-after evaluation. *S Afr*  
538 *Med J.* 2018;108(4):311.
- 539 43 Umoya omuhle. Workshop report: measuring and modifying patient flow and waiting times in South African  
540 primary health care clinics. 2020. [https://www.lshtm.ac.uk/sites/default/files/2020-](https://www.lshtm.ac.uk/sites/default/files/2020-11/Summary%20report%20on%20patient%20flow%20%26%20waiting%20times.pdf)  
541 [11/Summary%20report%20on%20patient%20flow%20%26%20waiting%20times.pdf](https://www.lshtm.ac.uk/sites/default/files/2020-11/Summary%20report%20on%20patient%20flow%20%26%20waiting%20times.pdf) (accessed 2021 Jan 26)
- 542 44 South Africa National Department of Health. Draft National Guideline for Management of Patient Waiting Times  
543 at Health Facilities. 2019. <https://www.idealhealthfacility.org.za/App/Document/Download/60> (accessed 2020  
544 Jul 2)
- 545 45 Dorward J, Msimango L, Gibbs A, et al. Understanding how community antiretroviral delivery influences  
546 engagement in HIV care: a qualitative assessment of the Centralised Chronic Medication Dispensing and  
547 Distribution programme in South Africa. *BMJ Open.* 2020;10(5):e035412.
- 548 46 Tukei BB, Fatti G, Tiam A, et al. Twelve-Month Outcomes of Community-Based Differentiated Models of  
549 Multimonth Dispensing of ART Among Stable HIV-Infected Adults in Lesotho: A Cluster-Randomized  
550 Noninferiority Trial. *J Acquir Immune Defic Syndr 1999.* 2020;85(3):280–91.

- 551 47 Fatti G, Ngorima-Mabhena N, Mothibi E, et al. Outcomes of Three- Versus Six-Monthly Dispensing of  
552 Antiretroviral Treatment (ART) for Stable HIV Patients in Community ART Refill Groups: A Cluster-Randomized  
553 Trial in Zimbabwe. *J Acquir Immune Defic Syndr* 1999. 2020;84(2):162–72.
- 554 48 Prust ML, Banda CK, Nyirenda R, et al. Multi-month prescriptions, fast-track refills, and community ART groups:  
555 results from a process evaluation in Malawi on using differentiated models of care to achieve national HIV  
556 treatment goals. *J Int AIDS Soc*. 2017;20(Suppl 4):21650.
- 557 49 Cassidy T, Grimsrud A, Keene C, et al. Twenty-four-month outcomes from a cluster-randomized controlled trial  
558 of extending antiretroviral therapy refills in ART adherence clubs. *J Int AIDS Soc*. 2020;23(12):e25649.
- 559 50 Naidoo L, Mahomed OH. Impact of Lean on patient cycle and waiting times at a rural district hospital in  
560 KwaZulu-Natal. *Afr J Prim Health Care Fam Med*. 2016;8(1).
- 561 51 Monroe-Wise A, Reisner E, Sherr K, et al. Using lean manufacturing principles to evaluate wait times for HIV-  
562 positive patients in an urban clinic in Kenya. *Int J STD AIDS*. 2017;28(14):1410–8.
- 563 52 Hoffmann CJ, Milovanovic M, Kinghorn A, et al. Value stream mapping to characterize value and waste  
564 associated with accessing HIV care in South Africa. *PLoS One*. 2018;13(7):e0201032.
- 565 53 The Health Foundation. Improving patient flow across organisations and pathways. 2013.  
566 <https://www.health.org.uk/publications/improving-patient-flow-across-organisations-and-pathways> (accessed  
567 2021 Feb 9)
- 568 54 Gottschalk SB. The cape triage score: a new triage system South Africa. Proposal from the cape triage group.  
569 *Emerg Med J*. 2006;23(2):149–53.
- 570 55 Bruijns SR, Wallis LA, Burch VC. Effect of introduction of nurse triage on waiting times in a South African  
571 emergency department. *Emerg Med J*. 2008;25(7):395–7.
- 572 56 Swart A-T, Muller CE, Rabie T. The role of triage to reduce waiting times in primary health care facilities in the  
573 North West province of South Africa. *Health SA Gesondheid*. 2018;23.
- 574 57 Stott BA, Moosa S. Exploring the sorting of patients in community health centres across Gauteng Province,  
575 South Africa. *BMC Fam Pract*. 2019;20(1):5.
- 576 58 Naidoo S, Seevnarain K, Nordstrom DL. Tuberculosis infection control in primary health clinics in eThekweni,  
577 KwaZulu-Natal, South Africa. *Int J Tuberc Lung Dis*. 2012;16(12):1600–4.
- 578 59 Reid MJ, Saito S, Nash D, Scardigli A, Casalini C, Howard AA. Implementation of tuberculosis infection control  
579 measures at HIV care and treatment sites in sub-Saharan Africa. *Int J Tuberc Lung Dis*. 2012;16(12):1605–12.
- 580 60 Claassens MM, van Schalkwyk C, du Toit E, et al. Tuberculosis in healthcare workers and infection control  
581 measures at primary healthcare facilities in South Africa. *PLoS One*. 2013;8(10):e76272.
- 582 61 Engelbrecht MC, Kigozi G, Janse van Rensburg AP, Van Rensburg DHJ. Tuberculosis infection control practices  
583 in a high-burden metro in South Africa: A perpetual bane for efficient primary health care service delivery. *Afr J*  
584 *Prim Health Care Fam Med*. 2018;10(1):e1–6.
- 585 62 Sokhela DG, Makhanya NJ, Sibiyi NM, Nokes KM. Experiences of Fast Queue health care users in primary health  
586 care facilities in eThekweni district, South Africa. *Curationis*. 2013;36(1):8 pages.
- 587 63 Atnafu A, Haile Mariam D, Wong R, Awoke T, Wondimeneh Y. Improving Adult ART Clinic Patient Waiting Time  
588 by Implementing an Appointment System at Gondar University Teaching Hospital, Northwest Ethiopia. *Adv*  
589 *Public Health*. 2015;2015:1–5.
- 590 64 Kwena ZA, Njoroge BW, Cohen CR, et al. The feasibility, time savings and economic impact of a designated time  
591 appointment system at a busy HIV care clinic in Kenya: a randomized controlled trial. *J Int AIDS Soc*.  
592 2015;18:19876.
- 593 65 Steenland M, Dula J, de Albuquerque A, et al. Effects of appointment scheduling on waiting time and utilisation  
594 of antenatal care in Mozambique. *BMJ Glob Health*. :9.
- 595 66 Dixon CA, Punguyire D, Mahabee-Gittens M, Ho M, Lindsell CJ. Patient Flow Analysis in Resource-Limited  
596 Settings: A Practical Tutorial and Case Study. *Glob Health Sci Pract*. 2015;3(1):126–34.
- 597 67 Wagner AD, Crocker J, Liu S, et al. Making Smarter Decisions Faster: Systems Engineering to Improve the Global



- 598 Public Health Response to HIV. *Curr HIV/AIDS Rep.* 2019;16(4):279–91.
- 599 68 Kreindler SA. The three paradoxes of patient flow: an explanatory case study. *BMC Health Serv Res.*
- 600 2017;17(1):481.
- 601
- 602

Preprint

603 **Tables and figures**

604 **Table 1. Characteristics of clinics, individuals attending, and staff working on the day of data collection,**  
 605 **overall and by province (N = 12 exercises at 11 clinics; N = 2,903 attendees)**

| Characteristic                                          | All clinics, n                     | KZN province, n (row %)            | WC province, n (row %)             |
|---------------------------------------------------------|------------------------------------|------------------------------------|------------------------------------|
| Number of clinics                                       | 11                                 | 6 (54.5)                           | 5 (45.5)                           |
| Number of data collection exercises                     | 12                                 | 7 (58.3)                           | 5 (41.7)                           |
| Hours of data collection, HH:MM                         | 77:02                              | 44:32 (57.8)                       | 32:30 (42.2)                       |
| Patients & visitors included                            | 2,903                              | 1,925 (66.3)                       | 978 (33.7)                         |
| <b>On the day of data collection</b>                    | <b>Median (range) per exercise</b> | <b>Median (range) per exercise</b> | <b>Median (range) per exercise</b> |
| Hours of data collection, HH:MM                         | 06:15 (05:37–07:18)                | 06:15 (05:40–07:08)                | 06:15 (05:37–07:18)                |
| Clinical staff working*, n                              | 16 (3–45)                          | 14 (8–45)                          | 17 (3–45)                          |
| Administrative staff working*, n                        | 11 (4–21)                          | 10 (7–17)                          | 16 (4–21)                          |
| Patients† per clinical staff*, n                        | 14 (5–27)                          | 14 (6–27)                          | 14 (5–18)                          |
| Patients and visitors included, n                       | 252 (69–417)                       | 269 (170–417)                      | 144 (69–337)                       |
| Proportion female, %                                    | 70.0 (56.3–789.7)                  | 71.2 (68.4–74.8)                   | 69.2 (56.3–79.7)                   |
| Proportion aged                                         |                                    |                                    |                                    |
| 0–5 years, %                                            | 9.1 (0.7–30.8)                     | 8.4 (7.1–10.1)                     | 10.4 (5.6–30.8)                    |
| 6–15 years, %                                           | 3.4 (0–9.4)                        | 3.5 (1.5–6.2)                      | 3.2 (0–8.3)                        |
| 16–25 years, %                                          | 17.3 (6.3–25.7)                    | 20.1 (15.9–25.3)                   | 15.0 (13.1–17.4)                   |
| 26–35 years, %                                          | 27.3 (19.4–36.2)                   | 27.8 (25.8–32.0)                   | 22.5 (19.4–36.2)                   |
| 36–45 years, %                                          | 18.6 (15.0–35.7)                   | 18.0 (15.3–24.8)                   | 20.3 (15.0–21.1)                   |
| >45 years, %                                            | 18.0 (7.2–35.4)                    | 18.4 (17.1–22.1)                   | 16.9 (7.2–35.4)                    |
| Proportion attending with a baby or very young child, % | 11.5 (0.7–36.2)                    | 11.2 (0.7–17.9)                    | 12.1 (10.4–36.2)                   |
| Proportion attending with ≥1 other person‡, %           | 24.9 (1.5–60.8)                    | 22.9 (1.5–35.9)                    | 27.9 (15.4–60.8)                   |
| Proportion attending for                                |                                    |                                    |                                    |
| Acute care/minor problems, %                            | 37.0 (9.3–53.5)                    | 28.8 (9.3–41.7)                    | 48.7 (34.8–53.5)                   |
| HIV care/ART, %                                         | 16.1 (0.8–85.9)                    | 32.6 (14.2–85.9)                   | 3.5 (0.8–7.1)¶                     |
| Tuberculosis, %                                         | 3.8 (0.6–16.3)                     | 2.2 (0.6–16.3)                     | 9.0 (2.1–13.3)                     |
| NCDs (including mental health), %                       | 4.4 (0–16.9)                       | 4.1 (0.4–5.3)                      | 6.9 (0–16.9)                       |
| Mother & child§, %                                      | 12.4 (0.7–30.4)                    | 14.7 (0.7–19.7)                    | 7.7 (4.2–30.4)                     |
| Maternal & obstetric, %                                 | 2.9 (0–8.7)                        | 3.2 (0–4.7)                        | 2.7 (0–8.7)                        |
| Accompanying a patient, %                               | 14.6 (1.5–22.5)                    | 12.4 (1.5–17.1)                    | 19.2 (10.1–22.5)                   |
| Attending for another person, %                         | 2.6 (0–6.3)                        | 2.9 (0–4.3)                        | 1.7 (0–6.3)                        |

606 \*Based on questionnaire administered to manager or senior member of staff; data from clinic KZ04 (including number  
 607 of staff) captured only for HIV/chronic unit

608 †Counted as those who reported a main visit reason that was not ‘accompanying’ or ‘attending for another person’

609 ‡Not including babies and very young children

610 §Includes attendance for family planning

611 ||Two exercises conducted at clinic KZ01, roughly one month apart

612 ¶Likely due to an error during data collection (see text). ‘HIV care/ART’ combined with ‘Acute care/minor problems’ for  
 613 subsequent analysis.

614 ART: antiretroviral therapy; KZN: KwaZulu-Natal; NCD: noncommunicable disease; WC: Western Cape

615 **Table 2. Results of univariable and multivariable mixed-effects linear regression using imputed data,**  
 616 **showing effects of different factors on total time spent in clinic (n = 2,634; 11 exercises in 10 clinics)**

| Variable                                                        | n     | Univariable analysis*                               |        | Multivariable analysis*                             |        |
|-----------------------------------------------------------------|-------|-----------------------------------------------------|--------|-----------------------------------------------------|--------|
|                                                                 |       | Difference in time spent, <i>p</i> minutes (95% CI) |        | Difference in time spent, <i>p</i> minutes (95% CI) |        |
| <b>Province</b>                                                 |       |                                                     |        |                                                     |        |
| KwaZulu-Natal                                                   | 1,656 | REF                                                 | 0.998  | REF                                                 | 0.734  |
| Western Cape                                                    | 978   | -0.03 (-32.2, 32.2)                                 |        | -5.1 (-34.8, 24.5)                                  |        |
| <b>Sex</b>                                                      |       |                                                     |        |                                                     |        |
| Male                                                            | 783   | REF                                                 | <0.001 | REF                                                 | <0.001 |
| Female                                                          | 1,851 | <b>17.0 (9.4, 24.5)</b>                             |        | <b>13.5 (6.0, 21.0)</b>                             |        |
| <b>Age group</b>                                                |       |                                                     |        |                                                     |        |
| <16 years                                                       | 381   | REF                                                 | 0.250  | REF                                                 | 0.332  |
| 16–45 years                                                     | 1,703 | -7.0 (-17.8, 3.7)                                   |        | -5.6 (-17.2, 5.9)                                   |        |
| ≥46 years                                                       | 550   | -10.3 (-22.2, 1.6)                                  |        | -9.9 (-22.7, 2.9)                                   |        |
| <b>Patients† to clinical staff‡ ratio</b>                       |       |                                                     |        |                                                     |        |
| <10:1                                                           | 698   | REF                                                 | 0.734  | REF                                                 | 0.821  |
| ≥10:1                                                           | 1,936 | -6.2 (-41.9, 29.5)                                  |        | -3.8 (-36.9, 29.3)                                  |        |
| <b>Attending with a baby or child aged less than ~15 months</b> |       |                                                     |        |                                                     |        |
| No                                                              | 2,271 | REF                                                 | <0.001 | REF                                                 | 0.002  |
| Yes                                                             | 344   | <b>25.6 (15.2, 36.0)</b>                            |        | <b>18.8 (8.1, 29.6)</b>                             |        |
| Not recorded                                                    | 19    | 17.0 (-23.1, 57.1)                                  |        | 10.0 (-28.8, 48.8)                                  |        |
| <b>Attending with ≥1 other person§</b>                          |       |                                                     |        |                                                     |        |
| No                                                              | 1,983 | REF                                                 | 0.004  | REF                                                 | 0.076  |
| Yes                                                             | 651   | <b>12.6 (4.0, 21.2)</b>                             |        | 8.9 (-0.9, 18.7)                                    |        |
| <b>Time of arrival</b>                                          |       |                                                     |        |                                                     |        |
| Per hour later than 07h00                                       | 2,634 | <b>-15.1 (-17.1, -13.1)</b>                         | <0.001 | <b>-14.9 (-16.9, -12.9)</b>                         | <0.001 |
| <b>Reason for visit</b>                                         |       |                                                     |        |                                                     |        |
| Acute care/HIV care                                             | 1,526 | REF                                                 | 0.002  | REF                                                 | 0.008  |
| Tuberculosis                                                    | 145   | <b>-27.2 (-43.8, -10.6)</b>                         |        | <b>-24.8 (-40.6, -8.9)</b>                          |        |
| NCDs (incl. mental health)                                      | 157   | -9.1 (-24.4, 6.2)                                   |        | -5.9 (-20.8, 9.0)                                   |        |
| Mother & child (incl. family planning)                          | 297   | 9.5 (-2.6, 21.6)                                    |        | -3.6 (-15.7, 8.5)                                   |        |
| Ante/post-natal                                                 | 66    | <b>-22.1 (-44.4, 0.1)</b>                           |        | <b>-32.6 (-54.0, -11.2)</b>                         |        |
| Accompanying                                                    | 360   | 2.9 (-7.9, 13.8)                                    |        | -7.3 (-18.7, 4.2)                                   |        |
| Attending on another's behalf                                   | 79    | -15.0 (-36.2, 6.3)                                  |        | -11.6 (-32.0, 8.7)                                  |        |
| Not recorded                                                    | 4     | 40.5 (-48.6, 129.5)                                 |        | 29.8 (-55.4, 115.1)                                 |        |

617 \*Mixed-effects linear regression with a random effect for clinic day (i.e., two visits to clinic 1 treated as separate  
 618 clusters).

619 †Attendees who reported a main visit reason that was not 'accompanying' or 'attending for another person'

620 ‡Includes enrolled ('staff') and professional nurses, clinical nurse practitioners, clinical and enrolled nursing assistants,  
 621 and doctors. Does not include lay-counsellors, peer navigators, community health workers, pharmacists, or  
 622 nursing/medical students.

623 §Not including babies and very young children

624 ART: antiretroviral therapy; CI: confidence interval; incl.: including; REF: reference; NCD: non-communicable diseases

625 **Figure 1. Box and whiskers plots showing proportions of time spent indoors and outdoors, by clinic (panel**  
 626 **A) and for two visits to clinic KZN1, by selected reasons for visit (panel B)**

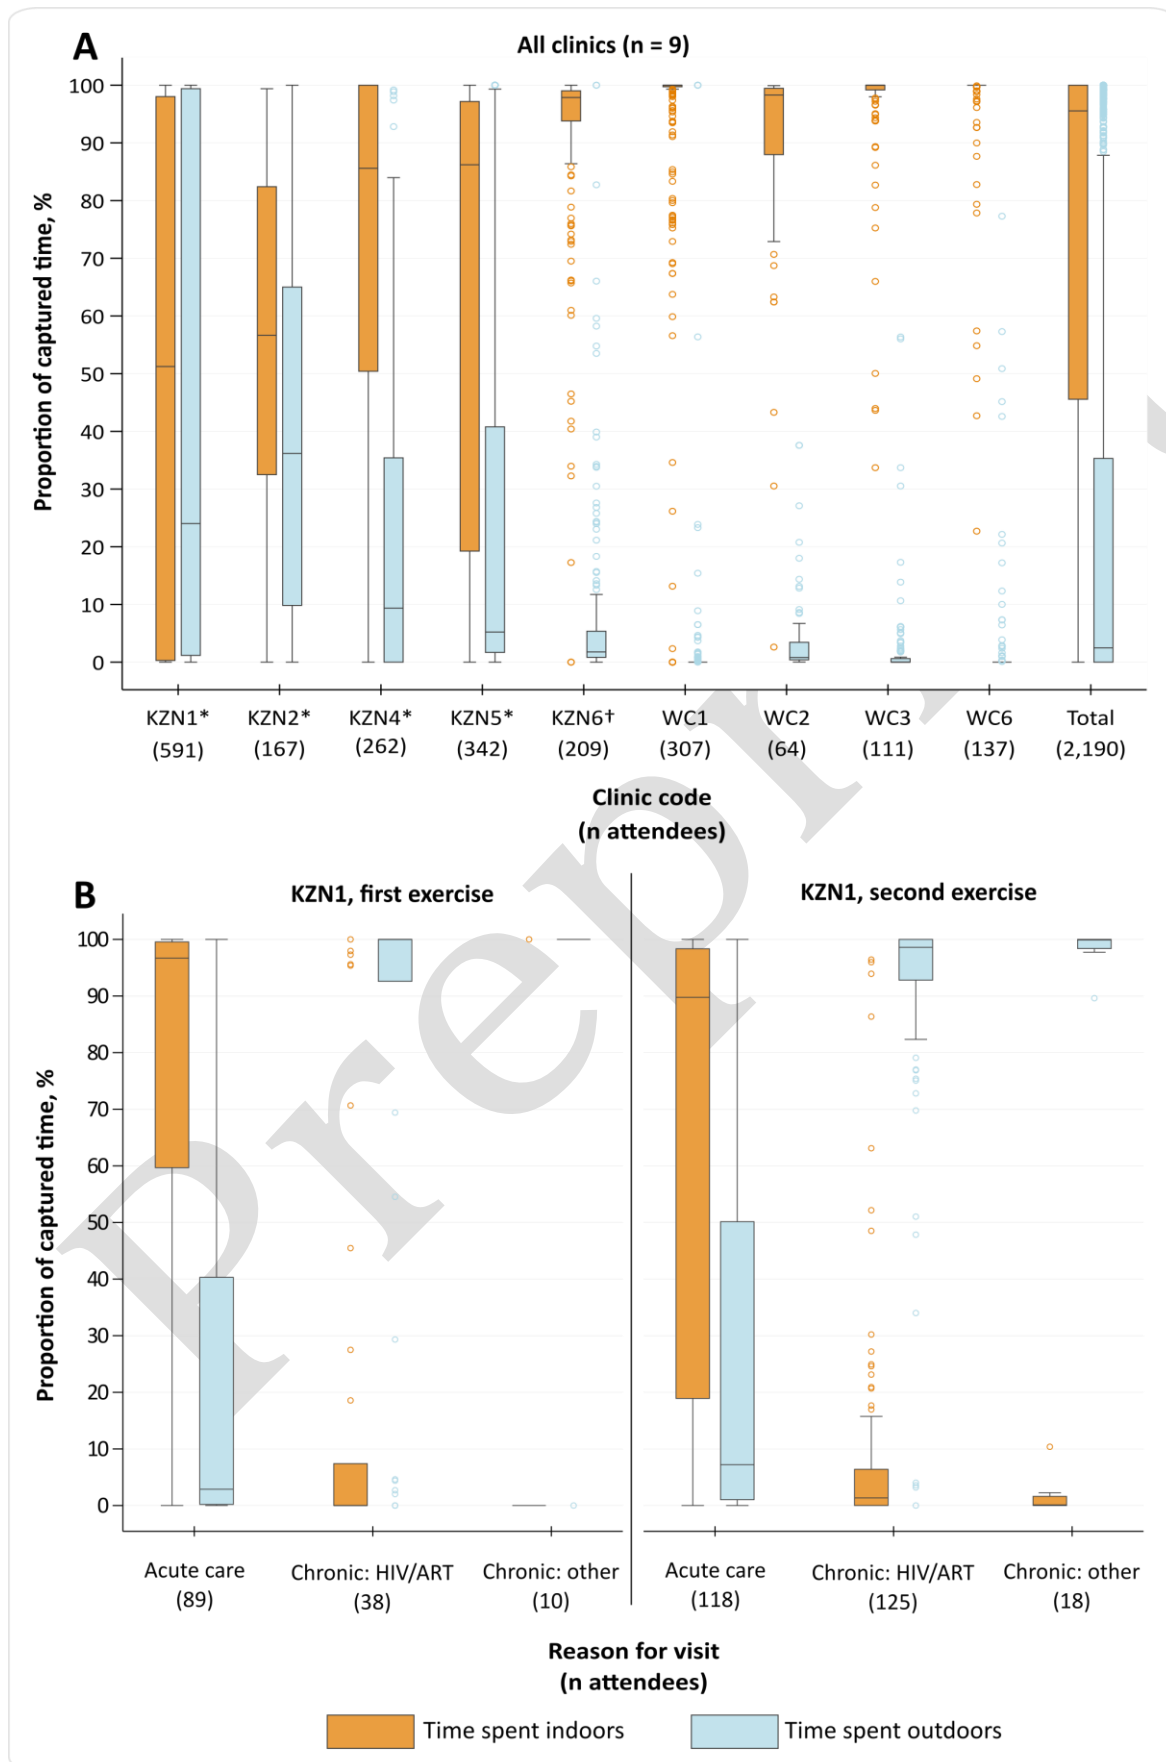

627

628 \*Clinic has at least one outdoor waiting area that is part of the patient pathway.

629 †Clinic has at least one outdoor waiting area, but it is not part of the patient pathway.

630 The central horizontal line represents the median value; boxes represent the interquartile range (IQR); and whiskers  
631 represent largest and smallest values within 1.5 IQR of the upper and lower quartiles, respectively. Time spent in  
632 unknown locations was negligible for most clinics and is therefore not shown.

633 **Panel A:** Proportions are shown by clinic for all attendees at nine clinics with at least five minutes captured. Data from  
634 both data collection exercises at clinic KZN1 are shown combined.

635 **Panel B:** Proportions are shown by self-reported reason for attendance for individuals with at least five minutes  
636 captured who were attending clinic KZN1 for the three selected reasons.

637 ART: antiretroviral therapy; KZN: KwaZulu-Natal; TB: tuberculosis; WC: Western Cape

Preprint

638 **Figure 2. Line graph (panel 1) and heat maps (panels 2–4) showing, respectively, total numbers of people**  
 639 **in three indoor waiting areas and approximate occupancy density (in persons/m<sup>2</sup>) of each waiting area in**  
 640 **each of clinics KZN2, KZN6, and WC1 from 0800–1345\***

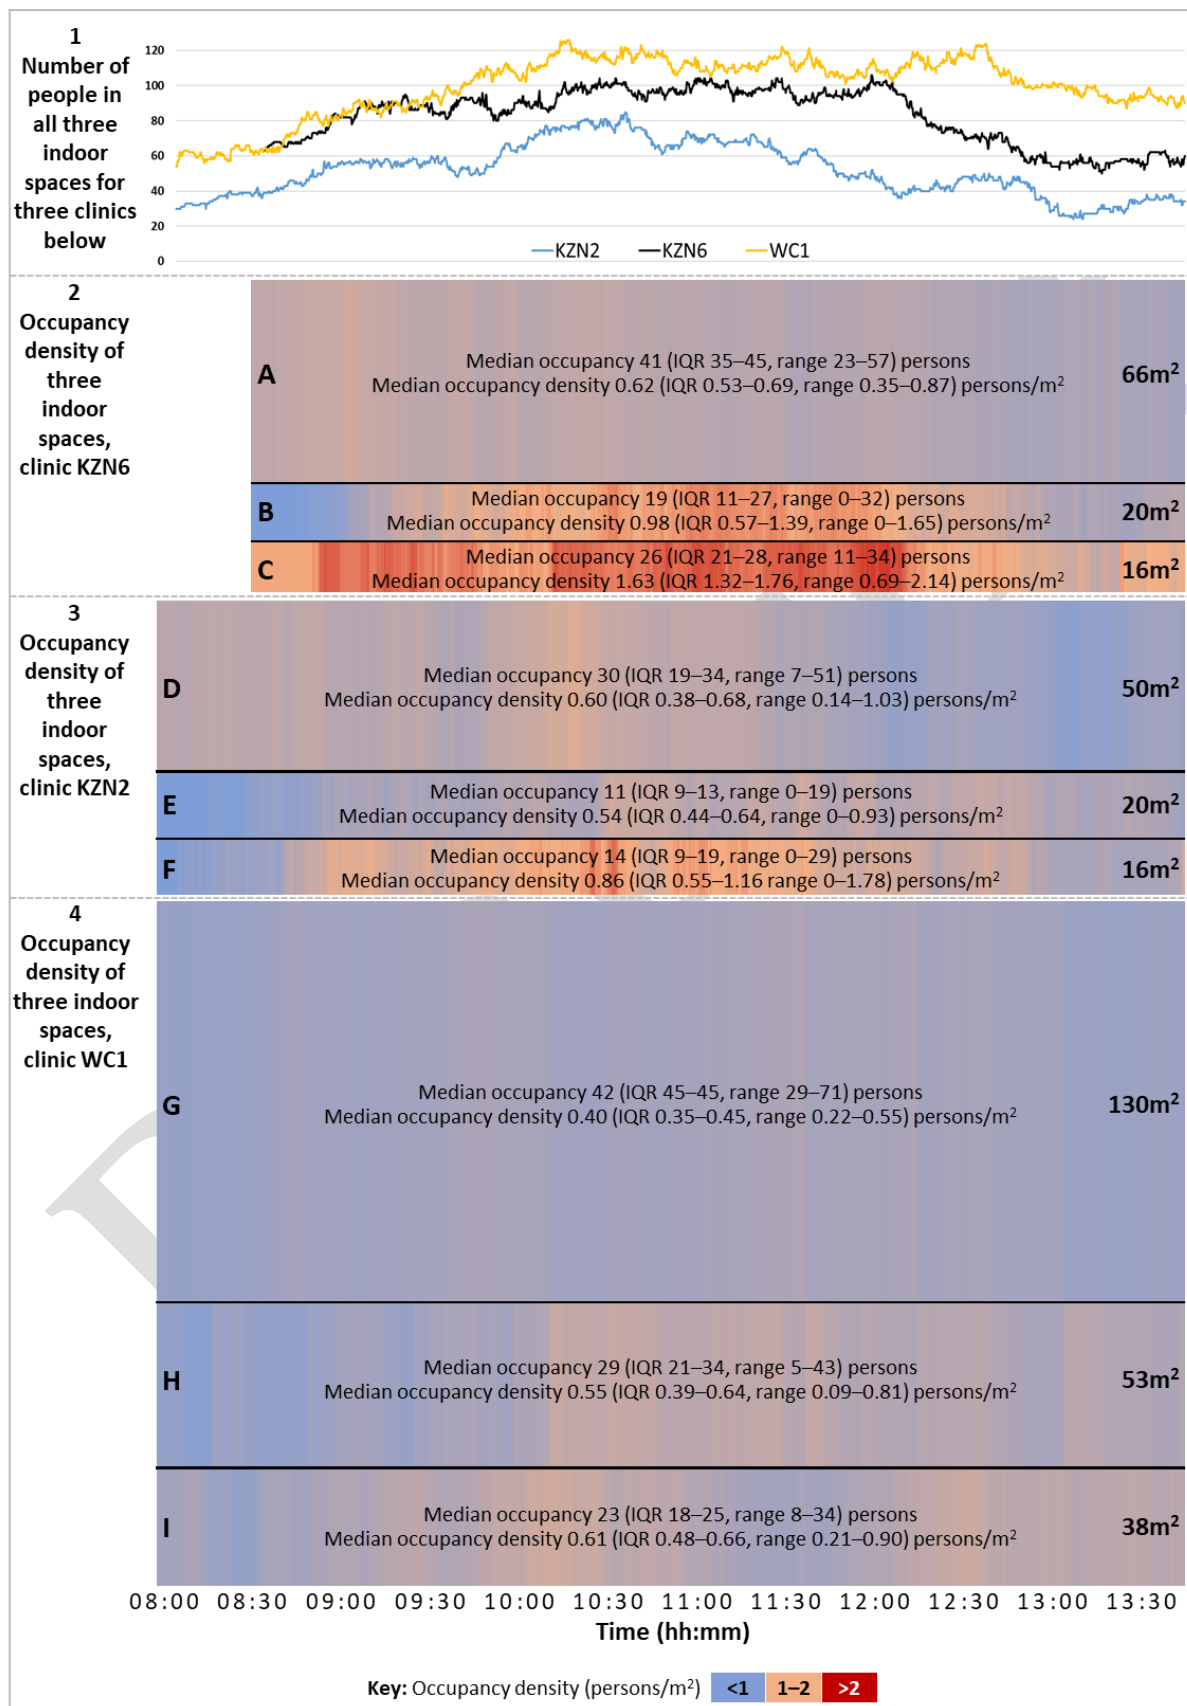

641

642 \*Data available only from 0830 for clinic KZN6.  
643 Height of each row proportional to the area of the space. Each clinic was visited on a different day. See Supplementary  
644 table 8 for occupancy density relative to room volume (persons/m<sup>3</sup>).  
645 Total numbers (line graph) indicative only of numbers of people occupying the three spaces examined, not overall  
646 numbers of people in the entire clinic.  
647 Spaces A, D, and G were the main (pre-filing +/- pre-vitals) formal waiting areas for their respective clinics; spaces B, C,  
648 H, and I were formal (pre-vitals and/or pre-consultation) waiting areas; space E was a corridor used as a pre-  
649 consultation waiting area; and space F was a combined pre-vitals waiting area, vitals administration area, and patient  
650 registration area.  
651 hh: hours; IQR: interquartile range; mm: minutes

Preprint
